# Supplementary material
Source: PubMed Central journal article supplement (PMC4940304)
Supplement: NIHMS748208-supplement-Supp_Fig_S1.pdf [file NIHMS748208-supplement-Supp_Fig_S1.pdf]

**Figure S1**

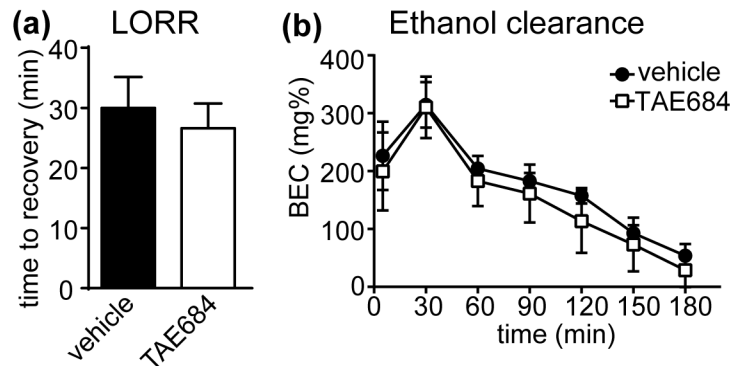

The ALK inhibitor TAE684 does not affect ethanol-induced loss of righting reflex (LORR) or ethanol clearance from the blood. (a) Time to recovery after ethanol-induced LORR after a 3.6 g/kg i.p. ethanol injection. There was no effect of TAE684 treatment on recovery time (t-test,  $t=0.51$ ,  $df=6$ ,  $P=0.63$ ). (b) Blood ethanol concentrations in mg% (BEC) after i.p. injection of 2 g/kg ethanol. Blood was taken from the tail vein every 30 min after injection for 3 h. BECs were determined using a nicotinamide adenine dinucleotide-alcohol dehydrogenase (NAD-ADH) enzymatic assay.
